# Supplementary material for: Triadin Decrease Impairs the Expression of E-C Coupling Related Proteins in Muscles of MPTP-Induced Parkinson’s Disease Mice
Source: Frontiers journal article supplement (doi:10.3389/fnins.2021.649688), 2021-04-22
Supplement: Data_Sheet_1.PDF [file Data_Sheet_1.PDF]

## C2C12 cells ( 400 x )

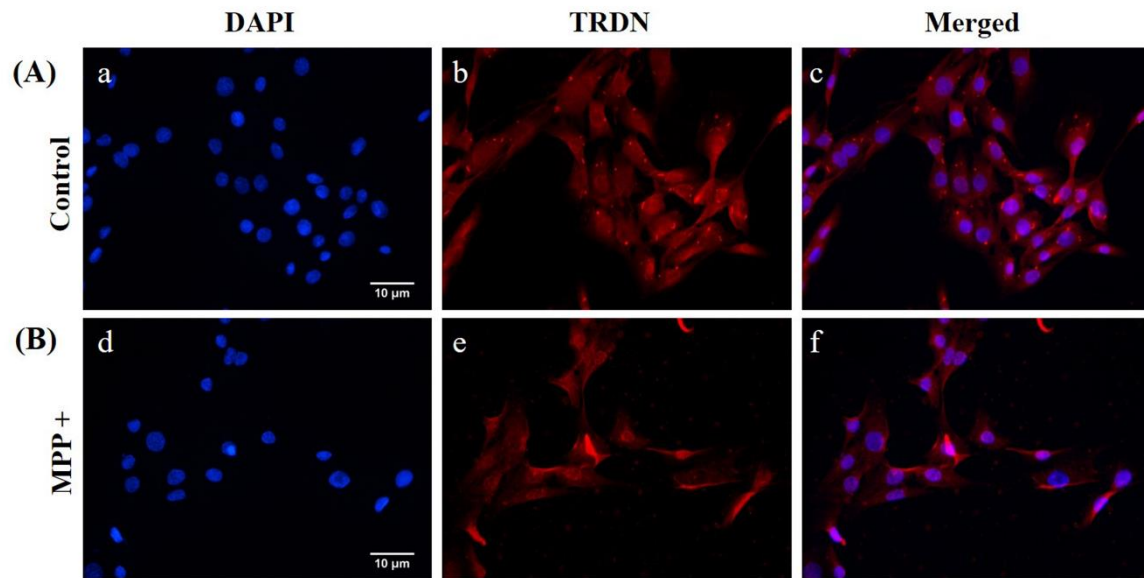

**Supplementary figure 1. Immunofluorescence staining of triadin (TRDN) in C2C12 cells. (A)** Control group. a, nuclei; b, TRDN; c, merge of a and b. **(B)** 1-methyl-4-phenylpyridinium (MPP+) group. d, nuclei; e, TRDN; f, merge of d and e. (scale bar, 10 μm)
